# Supplementary material for: The Complex Teleconnections and Feedback Mechanisms between Mainland Indochina's Southwest Monsoon and Arctic Ocean Climate Variability
Source: Copernicus journal article supplement (doi:10.5194/egusphere-2025-521), 2025-02-18
Supplement: Supplementary file 1 [file egusphere-2025-521-supplement.pdf]

1

# Supplementary

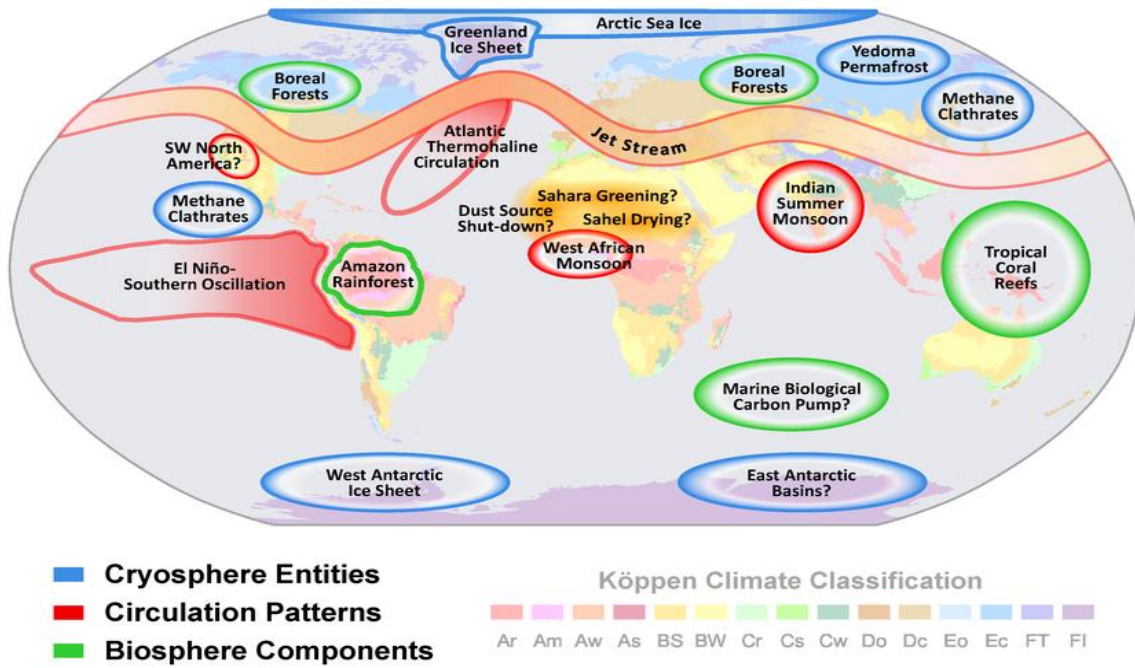

2

3 S- 1 Climate Tipping Points of the global circulations.

(a)

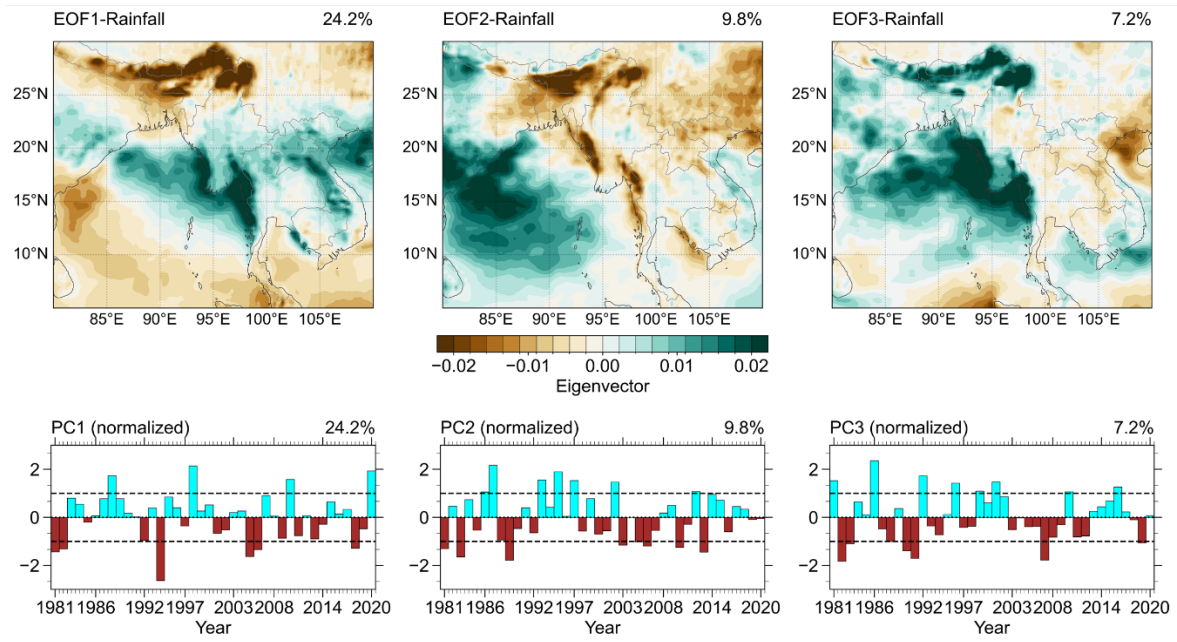

(b)

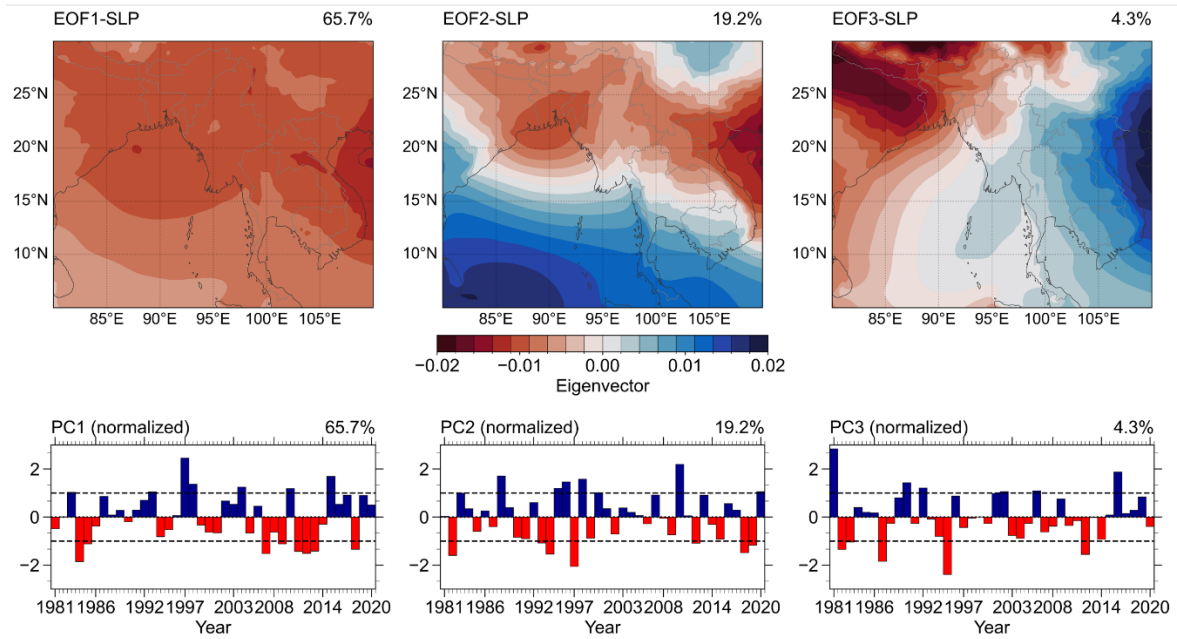

4

5 S- 2 Three dominant EOF modes of (a) JJAS rainfall and (b) Sea level pressure over study area during 1981-2020

6 with their principal components time series.

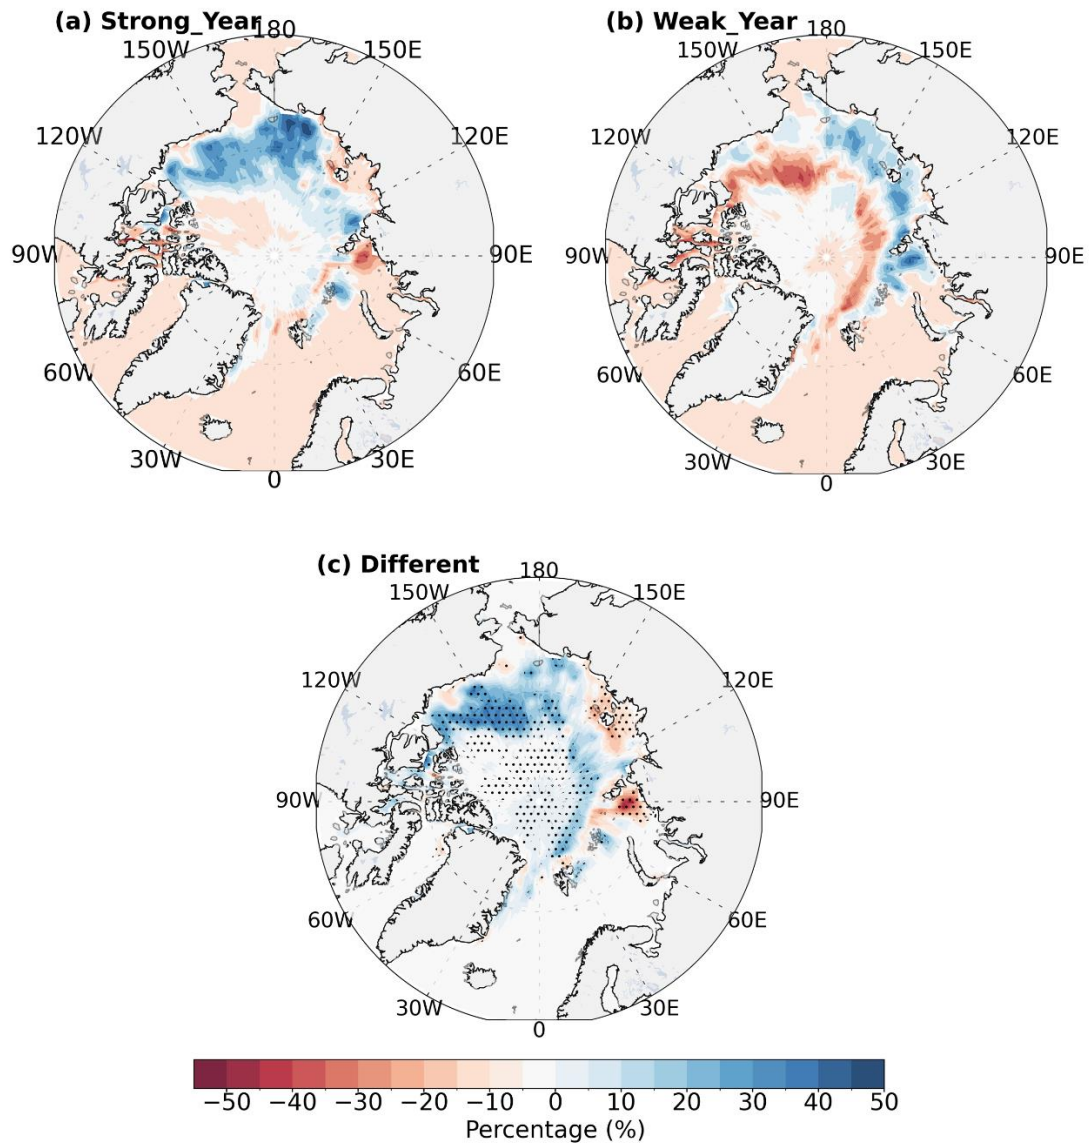

7  
8  
9  
10

S- 3 The mean of Composites anomalous ASI concentration for (a) strong MSWM years (b) weak MSWM years, and (c) the difference between (a,b) with dotted 95% significance level by using HadIsst dataset.
